# Supplementary material for: Further Support to the Uncoupling-to-Survive Theory: The Genetic Variation of Human UCP Genes Is Associated with Longevity
Source: PubMed Central journal article supplement (PMC3246500; doi:10.1371/journal.pone.0029650), 2011-12-27
Supplement: pone.0029650.s001.pdf [file pone.0029650.s001.pdf]

**Table S1.** Genotypic and allelic frequencies in the analyzed sample by group

|                | Younger group (N=375) |           |            | Older group (N=223) |           |            |
|----------------|-----------------------|-----------|------------|---------------------|-----------|------------|
| UCP2 rs659366  | Genotypes             | Frequency | Percentage | Genotypes           | Frequency | Percentage |
|                | G/G                   | 183       | 48.80      | G/G                 | 100       | 44.84      |
|                | G/A                   | 170       | 45.33      | G/A                 | 107       | 47.98      |
|                | A/A                   | 22        | 5.87       | A/A                 | 16        | 7.17       |
|                | Alleles               | Frequency | percentage | Alleles             | Frequency | Percentage |
|                | G                     | 536       | 71.47      | G                   | 307       | 68.83      |
|                | A                     | 214       | 28.53      | A                   | 139       | 31.17      |
| UCP2 rs660339  | Genotypes             | Frequency | Percentage | Genotypes           | Frequency | Percentage |
|                | C/C                   | 180       | 48.00      | C/C                 | 83        | 37.22      |
|                | C/T                   | 156       | 41.60      | C/T                 | 106       | 47.53      |
|                | T/T                   | 39        | 10.40      | T/T                 | 34        | 15.25      |
|                | Alleles               | Frequency | Percentage | Alleles             | Frequency | Percentage |
|                | C                     | 516       | 68.80      | C                   | 272       | 60.99      |
|                | T                     | 234       | 31.20      | T                   | 174       | 39.01      |
| UCP3 rs15763   | Genotypes             | Frequency | Percentage | Genotypes           | Frequency | Percentage |
|                | C/C                   | 218       | 58.13      | C/C                 | 121       | 54.26      |
|                | C/T                   | 141       | 37.60      | C/T                 | 82        | 36.77      |
|                | T/T                   | 16        | 4.27       | T/T                 | 20        | 8.97       |
|                | Alleles               | Frequency | Percentage | Alleles             | Frequency | Percentage |
|                | C                     | 577       | 76.93      | C                   | 324       | 72.65      |
|                | T                     | 173       | 23.07      | T                   | 122       | 27.35      |
| UCP3 rs1800849 | Genotypes             | Frequency | Percentage | Genotypes           | Frequency | Percentage |
|                | C/C                   | 322       | 85.87      | C/C                 | 164       | 73.54      |
|                | C/T                   | 48        | 12.80      | C/T                 | 58        | 26.01      |
|                | T/T                   | 5         | 1.33       | T/T                 | 1         | 0.45       |
|                | Alleles               | Frequency | Percentage | Alleles             | Frequency | Percentage |
|                | C                     | 692       | 92.27      | C                   | 386       | 86.55      |
|                | T                     | 58        | 7.73       | T                   | 60        | 13.45      |

|                 |            |           |            |           |           |            |
|-----------------|------------|-----------|------------|-----------|-----------|------------|
| UCP4 rs9472817  | Genotypes  | Frequency | Percentage | Genotypes | Frequency | Percentage |
|                 | C/C        | 92        | 24.53      | C/C       | 58        | 26.01      |
|                 | C/G        | 176       | 46.93      | C/G       | 125       | 56.05      |
|                 | G/G        | 107       | 28.53      | G/G       | 40        | 17.94      |
|                 | Alleles    | Frequency | Percentage | Alleles   | Frequency | Percentage |
|                 | C          | 360       | 48.00      | C         | 241       | 54.04      |
|                 | G          | 390       | 52.00      | G         | 205       | 45.96      |
| UCP4 rs10498769 | Genotypes  | Frequency | Percentage | Genotypes | Frequency | Percentage |
|                 | C/C        | 240       | 64.00      | C/C       | 147       | 65.92      |
|                 | C/G        | 124       | 33.07      | C/G       | 71        | 31.84      |
|                 | G/G        | 11        | 2.93       | G/G       | 5         | 2.24       |
|                 | Alleles    | Frequency | Percentage | Alleles   | Frequency | Percentage |
|                 | C          | 604       | 80.53      | C         | 365       | 81.84      |
|                 | G          | 146       | 19.47      | G         | 81        | 18.16      |
| UCP5 rs2235800  | Genotypes* | Frequency | Percentage | Genotypes | Frequency | Percentage |
|                 | T/T        | 75        | 35.21      | T/T       | 33        | 35.87      |
|                 | T/A        | 112       | 52.58      | T/A       | 46        | 50.00      |
|                 | A/A        | 26        | 12.21      | A/A       | 13        | 14.13      |
|                 | Alleles    | Frequency | Percentage | Alleles   | Frequency | Percentage |
|                 | T          | 262       | 61.50      | T         | 112       | 60.87      |
|                 | A          | 164       | 38.50      | A         | 72        | 39.13      |
| UCP5 rs5975178  | Genotypes* | Frequency | Percentage | Genotypes | Frequency | Percentage |
|                 | T/T        | 56        | 26.29      | T/T       | 29        | 31.52      |
|                 | C/T        | 106       | 49.77      | C/T       | 45        | 48.91      |
|                 | C/C        | 51        | 23.94      | C/C       | 18        | 19.57      |
|                 | Alleles    | Frequency | Percentage | Alleles   | Frequency | Percentage |
|                 | C          | 208       | 48.82629   | C         | 81        | 44.02      |
|                 | T          | 218       | 51.17371   | T         | 103       | 55.98      |

\*Genotypic and allelic data refer to only the female sample.
